# Supplementary material for: Digitalization of adverse event management in oncology to improve treatment outcome—A prospective study protocol
Source: PLOS journal article supplement (doi:10.1371/journal.pone.0252493), 2021-06-04
Supplement: S5 (10.1371/journal.pone.0252493.s005) [file journal.pone.0252493.s005]

**S 2 Table. Smartphone questionnaire for immunotherapies.**

|                | Smartphone questionnaire                                  | Grade 0                   | Grad 1                       | Grad 2                                       | Grad 3                            |
|----------------|-----------------------------------------------------------|---------------------------|------------------------------|----------------------------------------------|-----------------------------------|
| <b>General</b> | How are you?                                              | very good                 | good                         | moderate                                     | poor                              |
|                | Did you exercise today?                                   | yes, more than 30 minutes | no, mostly no exercise       |                                              |                                   |
|                | Was today something special?                              | Please comment            |                              |                                              |                                   |
|                | Did you require the demand medication?                    | no                        | yes                          |                                              |                                   |
| <b>CTCAE</b>   | How often did you go to the bathroom with diarrhea today? | not at all                | 1-3 times                    | 4-6 times                                    | more than 6 times                 |
|                | How many times did you vomit today?                       | not at all                | 1-2 times                    | 3-5 times                                    | more than 5 times                 |
|                | Do you have any pain?                                     | no                        | few                          | moderate                                     | severe                            |
|                | Do you have pain when you eat?                            | no pain                   | flush, but no pain           | moderate pain, normal eating                 | severe pain, limited eating       |
|                | How did you eat today?                                    | normal, with appetite     | without appetite, but normal | less than normal                             | very little to nothing            |
|                | Do you have sensibility disorders?                        | no                        | yes, sporadic                | yes, mild and persistent                     | yes, severe and persistent        |
|                | Are you excessively tired?                                | no                        | yes, but resting helps       | yes, and it is not getting better by resting | yes, and I require permanent help |
|                | What is your weight? (Used to calculate weight loss)      | <5% weight loss           | 5-10% weight loss            | 10-20% weight loss                           | >20% weight loss                  |
| <b>Immune</b>  | What is your blood pressure?                              | below 120/80              | 120-139/80-89                | 140-159/90-99                                | 160/100 or more                   |
|                | Do you suffer from skin changes like redness or rashes?   | no                        | yes                          |                                              |                                   |
|                | Are your eyes yellow?                                     | no                        | yes                          |                                              |                                   |
|                | Has our vision changed?                                   | no                        | yes                          |                                              |                                   |
|                | Do you have muscle pain?                                  | no                        | yes                          |                                              |                                   |
|                | Do you have joint pain?                                   | no                        | yes                          |                                              |                                   |
|                | Do you suffer from respiratory distress?                  | no                        | yes                          |                                              |                                   |
|                | Can you endure less physical stress?                      | no                        | yes                          |                                              |                                   |
|                | What is your pulse?                                       | Please enter a value      |                              |                                              |                                   |

Remark: The grades refer to the severity of the occurred adverse effect. The CTCAE scoring includes grade 1 to 5. We modify this scoring including grade 0 (= no side effect) and stopped our scoring at grade 3. This procedure is based on the fact that our app is designed for outpatients, thus excluding life-threatening consequences (grade 4) or death (grade 5). The meaning of each grading is in accordance with (CTCAE v5.0 Clean, Tracked, and Mapping Document) and was translated into German.
